# Supplementary material
Source: PubMed Central journal article supplement (PMC4549188)
Supplement: NIHMS686213-supplement-3.pdf [file NIHMS686213-supplement-3.pdf]

**Table S1**— Proportions of deaths due to specific causes before and after onset of ESRD

| <b>Type of Death</b><br>N (%)        | <b>Pre-ESRD</b>    | <b>Post-ESRD</b> | <b>P</b><br><b>Value</b> |
|--------------------------------------|--------------------|------------------|--------------------------|
| <b>CV Death</b>                      | <b>347 (57.64)</b> | <b>95(46.34)</b> | <b>0.01</b>              |
| Fatal MI                             | 44(7.31)           | 15(7.32)         | 0.9                      |
| Fatal Stroke                         | 31(5.15)           | 11(5.37)         | 0.90                     |
| Presumed CV Death                    | 46(7.64)           | 12(5.85)         | 0.39                     |
| Pump Failure                         | 62(10.30)          | 11(5.37)         | 0.03                     |
| CV Other                             | 16(2.66)           | 10(4.88)         | 0.12                     |
| Presumed Sudden Death                | 31(5.15)           | 4(1.95)          | 0.05                     |
| Definite Sudden Death                | 117(19.44)         | 32(15.61)        | 0.22                     |
| Definite or Presumed<br>Sudden Death | 148(24.58)         | 36(17.56)        | 0.04                     |
| <b>Non-CV Death</b>                  | <b>199(33.06)</b>  | <b>99(48.29)</b> | <b>&lt;0.001</b>         |
| Infection                            | 61(10.13)          | 37(18.05)        | 0.002                    |
| Malignancy                           | 57(9.47)           | 7(3.41)          | 0.01                     |
| Other                                | 76(12.62)          | 27(13.17)        | 0.84                     |
| Renal                                | 5(0.83)            | 28(13.66)        | <0.001                   |
| <b>Unknown</b>                       | <b>56(9.30)</b>    | <b>11(5.37)</b>  | <b>0.08</b>              |
