# Supplementary material
Source: PubMed Central journal article supplement (PMC4549188)
Supplement: NIHMS686213-supplement-4.pdf [file NIHMS686213-supplement-4.pdf]

**Table S2.** Proportions of deaths due to specific causes according to last estimate of renal function prior to death

|                                      | <b>ESRD</b>      | <b>Q1</b>                      | <b>Q2</b>                      | <b>Q3</b>                      | <b>Q4</b>                      | <b>P</b>     |
|--------------------------------------|------------------|--------------------------------|--------------------------------|--------------------------------|--------------------------------|--------------|
|                                      |                  | ≤24.2                          | 24.3-31.6                      | 31.7-40.2                      | ≥40.3                          | <b>Value</b> |
|                                      |                  | mL/min/<br>1.73 m <sup>2</sup> | mL/min/<br>1.73 m <sup>2</sup> | mL/min/<br>1.73 m <sup>2</sup> | mL/min/<br>1.73 m <sup>2</sup> |              |
| All Cause Death                      | 205              | 213                            | 147                            | 129                            | 112                            |              |
| <b>CV Death</b>                      | <b>95(46.32)</b> | <b>121(56.81)</b>              | <b>88(59.86)</b>               | <b>72(55.81)</b>               | <b>65(58.04)</b>               | <b>0.05</b>  |
| Fatal MI                             | 15(7.32)         | 20(9.39)                       | 9(6.12)                        | 5(3.88)                        | 10(8.93)                       | 0.61         |
| Fatal Stroke                         | 11(5.37)         | 13(6.10)                       | 7(4.76)                        | 8(6.20)                        | 3(2.68)                        | 0.42         |
| Presumed CV Death                    | 12(5.85)         | 17(7.98)                       | 12(8.16)                       | 10(7.75)                       | 7(6.25)                        | 0.81         |
| Pump Failure                         | 11(5.37)         | 16(7.51)                       | 19(12.93)                      | 14(10.85)                      | 12(10.71)                      | 0.03         |
| CV Other                             | 10(4.88)         | 2(0.94)                        | 4(2.72)                        | 5(3.88)                        | 5(4.46)                        | 0.80         |
| Presumed Sudden Death                | 4(1.95)          | 12(5.63)                       | 10(6.80)                       | 5(3.88)                        | 4(3.57)                        | 0.55         |
| Definite Sudden Death                | 32(15.61)        | 41(19.25)                      | 27(18.37)                      | 25(19.38)                      | 24(21.43)                      | 0.24         |
| Definite or Presumed<br>Sudden Death | 36(17.56)        | 53(24.88)                      | 37(25.17)                      | 30(23.26)                      | 28(25.00)                      | 0.17         |
| <b>Non-CV Death</b>                  | <b>99(48.29)</b> | <b>74(34.74)</b>               | <b>44(29.93)</b>               | <b>44(34.11)</b>               | <b>37(33.04)</b>               | <b>0.004</b> |
| Infection                            | 37(18.05)        | 27(12.68)                      | 13(8.84)                       | 11(8.53)                       | 10(8.93)                       | 0.004        |
| Malignancy                           | 7(3.41)          | 17(7.98)                       | 14(9.52)                       | 13(10.08)                      | 13(11.61)                      | 0.006        |
| Other                                | 27(13.17)        | 26(12.21)                      | 16(10.88)                      | 20(15.50)                      | 14(12.50)                      | 0.85         |
| Renal                                | 28(13.66)        | 4(1.88)                        | 1(0.68)                        | 0(0)                           | 0(0)                           | <0.001       |
| <b>Unknown</b>                       | <b>11(5.37)</b>  | <b>18(8.45)</b>                | <b>15(10.20)</b>               | <b>13(10.08)</b>               | <b>10(8.93)</b>                | <b>0.15</b>  |
