# Supplementary material
Source: PubMed Central journal article supplement (PMC4549188)
Supplement: NIHMS686213-supplement-5.pdf [file NIHMS686213-supplement-5.pdf]

**Table S3**—Cause-specific cumulative incidence of mortality according to baseline eGFR estimated with the 4-variable non-IDMS traceable MDRD formula

| Type of Death<br>(N=806)             | Q1<br>1.03 - 24.56<br>mL/min/1.73 m <sup>2</sup><br>(N=1009) | Q2<br>24.57 - 31.62<br>mL/min/1.73 m <sup>2</sup><br>(N=1009) | Q3<br>31.67 - 39.94<br>mL/min/1.73 m <sup>2</sup><br>(N=1011) | Q4<br>40.03 - 135.3<br>mL/min/1.73 m <sup>2</sup><br>(N=1006) | P<br>Value       |
|--------------------------------------|--------------------------------------------------------------|---------------------------------------------------------------|---------------------------------------------------------------|---------------------------------------------------------------|------------------|
| <b>Overall</b>                       | <b>28.7%</b><br><b>(25.5 - 32.0)</b>                         | <b>22.5%</b><br><b>(19.6 - 25.5)</b>                          | <b>18.9%</b><br><b>(16.2 - 21.7)</b>                          | <b>18.8%</b><br><b>(16.0 - 21.7)</b>                          | <b>&lt;0.001</b> |
| <b>CV Death</b>                      | <b>14.3%</b><br><b>(11.9 - 16.8)</b>                         | <b>12.0%</b><br><b>(9.8 - 14.3)</b>                           | <b>11.6%</b><br><b>(9.5 - 14.1)</b>                           | <b>10.1%</b><br><b>(8.1 - 12.5)</b>                           | 0.002            |
| Fatal MI                             | 2.1%<br>(1.3 - 3.3)                                          | 1.8%<br>(1.0 - 3.0)                                           | 1.1%<br>(0.6 - 1.9)                                           | 1.0%<br>(0.5 - 1.8)                                           | 0.057            |
| Fatal Stroke                         | 1.2%<br>(0.7 - 2.2)                                          | 1.4%<br>(0.8 - 2.4)                                           | 1.0%<br>(0.5 - 1.8)                                           | 0.8%<br>(0.3 - 1.6)                                           | 0.086            |
| Presumed CV Death                    | 1.8%<br>(1.1 - 2.9)                                          | 1.5%<br>(0.8 - 2.6)                                           | 1.8%<br>(1.0 - 3.0)                                           | 1.2%<br>(0.6 - 2.1)                                           | 0.23             |
| Pump Failure                         | 2.3%<br>(1.5 - 3.5)                                          | 1.7%<br>(1.0 - 2.7)                                           | 1.5%<br>(0.8 - 2.6)                                           | 2.2%<br>(1.2 - 3.6)                                           | 0.55             |
| CV Other                             | 0.5%<br>(0.2 - 1.3)                                          | 0.9%<br>(0.4 - 1.8)                                           | 0.7%<br>(0.3 - 1.6)                                           | 0.8%<br>(0.3 - 1.5)                                           | 0.55             |
| Presumed Sudden Death                | 1.2%<br>(0.6 - 2.0)                                          | 0.9%<br>(0.4 - 1.8)                                           | 1.4%<br>(0.7 - 2.5)                                           | 0.6%<br>(0.2 - 1.3)                                           | 0.51             |
| Definite Sudden Death                | 5.1%<br>(3.7 - 6.8)                                          | 3.7%<br>(2.5 - 5.2)                                           | 4.1%<br>(2.9 - 5.7)                                           | 3.7%<br>(2.5 - 5.4)                                           | 0.096            |
| Definite or Presumed<br>Sudden Death | 6.2%<br>(4.7 - 8.1)                                          | 4.6%<br>(3.2 - 6.2)                                           | 5.5%<br>(4.0 - 7.3)                                           | 4.3%<br>(3.0 - 6.0)                                           | 0.07             |
| <b>Non-CV Death</b>                  | <b>12.1%</b><br><b>(9.9 - 14.6)</b>                          | <b>8.8%</b><br><b>(6.9 - 10.9)</b>                            | <b>6.4%</b><br><b>(4.8 - 8.2)</b>                             | <b>6.7%</b><br><b>(5.1 - 8.7)</b>                             | <b>&lt;0.001</b> |
| Infection                            | 4.7%<br>(3.4 - 6.4)                                          | 2.8%<br>(1.9 - 4.1)                                           | 2.0%<br>(1.1 - 3.2)                                           | 1.6%<br>(0.9 - 2.8)                                           | <0.001           |
| Malignancy                           | 1.8%<br>(1.0 - 3.0)                                          | 2.2%<br>(1.3 - 3.4)                                           | 1.4%<br>(0.7 - 2.4)                                           | 1.9%<br>(1.1 - 3.1)                                           | 0.67             |
| Other                                | 3.8%<br>(2.6 - 5.3)                                          | 2.7%<br>(1.7 - 4.0)                                           | 2.2%<br>(1.4 - 3.4)                                           | 2.7%<br>(1.7 - 3.9)                                           | 0.13             |
| Renal                                | 1.8%<br>(1.0 - 3.1)                                          | 1.0%<br>(0.5 - 2.0)                                           | 0.8%<br>(0.4 - 1.7)                                           | 0.5%<br>(0.1 - 1.5)                                           | 0.011            |
| Non CV/Non-Renal Death               | 10.3%<br>(8.3 - 12.6)                                        | 7.8%<br>(6.0 - 9.7)                                           | 5.5%<br>(4.1 - 7.3)                                           | 6.2%<br>(4.7 - 8.1)                                           | <0.001           |
| <b>Unknown</b>                       | <b>2.4%</b><br><b>(1.4 - 3.7)</b>                            | <b>1.7%</b><br><b>(1.0 - 2.9)</b>                             | <b>0.8%</b><br><b>(0.4 - 1.7)</b>                             | <b>1.9%</b><br><b>(1.1 - 3.1)</b>                             | <b>0.29</b>      |

Estimated cumulative incidence rates at 3 years are provided. P value for trend test refers to risk of death across all patient follow-up for each cause of death across eGFR quartiles. Renal deaths defined as refusal of dialysis, or death in the setting of acute kidney injury or from direct complications of uremia, dialysis, or renal procedure. Other deaths include suicide and deaths from pulmonary, hepatobiliary, gastrointestinal, procedural, and accidental causes.
