# Supplementary material
Source: PubMed Central journal article supplement (PMC4549188)
Supplement: NIHMS686213-supplement-6.pdf [file NIHMS686213-supplement-6.pdf]

**Table S4.** Hazard Ratios for Death using time-updated eGFR and ESRD status

| Death                             | ESRD                                     | Category 1<br>(≤24.3)                    | Category 2<br>(24.4-31.6)                | Category 3<br>(31.7-40.2)              | Category 4<br>(≥40.3) | Overall<br>p          |
|-----------------------------------|------------------------------------------|------------------------------------------|------------------------------------------|----------------------------------------|-----------------------|-----------------------|
| <b>Overall</b>                    | <b>5.45</b><br><b>(4.30-6.92)</b>        | <b>1.62</b><br><b>(1.29-2.03)</b>        | <b>1.31</b><br><b>(1.03-1.69)</b>        | <b>1.22</b><br><b>(0.94-1.56)</b>      | <b>-ref-</b>          | <b>&lt;0.001</b>      |
| <b>CV Death</b>                   | <b>4.36</b><br><b>(3.15-6.05)</b>        | <b>1.62</b><br><b>(1.20-2.19)</b>        | <b>1.34</b><br><b>(0.97-1.86)</b>        | <b>1.19</b><br><b>(0.85-1.66)</b>      | <b>-ref-</b>          | <b>&lt;0.001</b>      |
| Fatal MI                          | 5.22<br>(2.22-12.29)                     | 1.83<br>(0.83-4.03)                      | 1.04<br>(0.41-2.62)                      | 0.69<br>(0.24-1.93)                    | -ref-                 | <0.001                |
| Fatal Stroke                      | 12.52<br>(3.43-45.78)                    | 3.46<br>(0.99-12.15)                     | 2.42<br>(0.63-9.38)                      | 2.75<br>(0.73-10.36)                   | -ref-                 | <0.001                |
| Presumed CV                       | 4.44<br>(1.72-11.47)                     | 1.95<br>(0.81-4.71)                      | 1.78<br>(0.70-4.53)                      | 1.48<br>(0.56-3.88)                    | -ref-                 | 0.004                 |
| Pump Failure                      | 2.52<br>(1.09-5.82)                      | 1.21<br>(0.58-2.52)                      | 1.45<br>(0.69-3.04)                      | 1.28<br>(0.60-2.74)                    | -ref-                 | 0.13                  |
| CV other                          | 9.36<br>(2.89-30.30)                     | 0.35<br>(0.07-1.78)                      | 0.81<br>(0.22-3.03)                      | 1.00<br>(0.29-3.45)                    | -ref-                 | 0.03                  |
| Definite Sudden Death             | 3.68<br>(2.13-6.36)                      | 1.54<br>(0.94-2.52)                      | 1.03<br>(0.59-1.82)                      | 1.07<br>(0.61-1.88)                    | -ref-                 | <0.001                |
| Presumed Sudden Death             | 3.27<br>(0.79-13.43)                     | 2.48<br>(0.80-7.68)                      | 2.58<br>(0.81-8.24)                      | 1.29<br>(0.35-4.80)                    | -ref-                 | 0.04                  |
| Definite or Presumed Sudden Death | 3.65<br>(2.20-6.08)                      | 1.67<br>(1.06-2.63)                      | 1.26<br>(0.76-2.07)                      | 1.10<br>(0.66-1.85)                    | -ref-                 | <0.001                |
| <b>Non-CV</b>                     | <b>8.78</b><br><b>(5.96-12.94)</b>       | <b>1.66</b><br><b>(1.12-2.46)</b>        | <b>1.21</b><br><b>(0.78-1.87)</b>        | <b>1.22</b><br><b>(0.79-1.89)</b>      | <b>-ref-</b>          | <b>&lt;0.001</b>      |
| Infection                         | 13.84<br>(6.76-28.31)                    | 2.29<br>(1.11-4.72)                      | 1.35<br>(0.59-3.07)                      | 1.02<br>(0.43-2.46)                    | -ref-                 | <0.001                |
| Malignancy                        | 1.50<br>(0.59-3.83)                      | 1.05<br>(0.51-2.16)                      | 1.12<br>(0.53-2.38)                      | 1.03<br>(0.48-2.23)                    | -ref-                 | 0.56                  |
| Other                             | 6.41<br>(3.30-12.42)                     | 1.54<br>(0.80-2.94)                      | 1.12<br>(0.54-2.31)                      | 1.54<br>(0.78-3.03)                    | -ref-                 | <0.001                |
| Renal Unknown                     | 999<br><b>2.18</b><br><b>(0.92-5.19)</b> | 999<br><b>1.46</b><br><b>(0.67-3.16)</b> | 999<br><b>1.54</b><br><b>(0.69-3.43)</b> | 0<br><b>1.37</b><br><b>(0.60-3.12)</b> | -ref-<br><b>-ref-</b> | <0.001<br><b>0.12</b> |

Cox proportional hazard models using time vary estimates of eGFR.
