# Supplementary material
Source: PubMed Central journal article supplement (PMC4549188)
Supplement: NIHMS686213-supplement-7.pdf [file NIHMS686213-supplement-7.pdf]

**Table S5**—Non-competing risk estimates of cause-specific annualized mortality according estimated glomerular filtration rate

| <b>Type of Death</b>              | <b>Q1</b><br>0.9-24.2<br>mL/min/1.73<br>m <sup>2</sup><br>(N=1008) | <b>Q2</b><br>24.3-31.6<br>mL/min/1.73<br>m <sup>2</sup><br>(N=1014) | <b>Q3</b><br>31.7-40.2<br>mL/min/1.73<br>m <sup>2</sup><br>(N=1007) | <b>Q4</b><br>40.3-119.8<br>mL/min/1.73<br>m <sup>2</sup><br>(N=1006) | <b>P Value</b>   |
|-----------------------------------|--------------------------------------------------------------------|---------------------------------------------------------------------|---------------------------------------------------------------------|----------------------------------------------------------------------|------------------|
| Overall                           | 11.65                                                              | 7.80                                                                | 6.99                                                                | 6.22                                                                 | <0.001           |
| <b>CV Death</b>                   | <b>5.97</b>                                                        | <b>4.25</b>                                                         | <b>4.08</b>                                                         | <b>3.55</b>                                                          | <0.001           |
| Fatal MI                          | 0.93                                                               | 0.62                                                                | 0.32                                                                | 0.52                                                                 | 0.03             |
| Fatal Stroke                      | 0.59                                                               | 0.51                                                                | 0.40                                                                | 0.20                                                                 | 0.03             |
| Presumed CV Death                 | 0.72                                                               | 0.62                                                                | 0.56                                                                | 0.44                                                                 | 0.19             |
| Pump Failure                      | 0.89                                                               | 0.74                                                                | 0.60                                                                | 0.68                                                                 | 0.32             |
| CV Other                          | 0.17                                                               | 0.39                                                                | 0.20                                                                | 0.28                                                                 | 0.79             |
| Presumed Sudden Death             | 0.51                                                               | 0.23                                                                | 0.44                                                                | 0.24                                                                 | 0.28             |
| Definite Sudden Death             | 2.16                                                               | 1.13                                                                | 1.56                                                                | 1.20                                                                 | 0.03             |
| Definite or Presumed Sudden Death | 2.67                                                               | 1.36                                                                | 2.00                                                                | 1.44                                                                 | 0.02             |
| <b>Non-CV Death</b>               | <b>4.75</b>                                                        | <b>2.89</b>                                                         | <b>2.36</b>                                                         | <b>2.11</b>                                                          | <b>&lt;0.001</b> |
| Infection                         | 1.74                                                               | 1.01                                                                | 0.68                                                                | 0.56                                                                 | <0.001           |
| Malignancy                        | 0.72                                                               | 0.78                                                                | 0.48                                                                | 0.60                                                                 | 0.36             |
| Other                             | 1.65                                                               | 0.82                                                                | 0.88                                                                | 0.84                                                                 | 0.01             |
| Renal                             | 0.64                                                               | 0.27                                                                | 0.32                                                                | 0.12                                                                 | 0.01             |
| <b>Unknown</b>                    | <b>0.93</b>                                                        | <b>0.66</b>                                                         | <b>0.56</b>                                                         | <b>0.56</b>                                                          | <b>0.11</b>      |

Incident rates (non-competing risk estimates) are provided in events per 100 patient-years. P values are for trend in incidence rate attributable to each cause across eGFR quartiles. Renal deaths defined as refusal of dialysis, or death in the setting of acute kidney injury or from direct complications of uremia, dialysis, or renal procedure. Other deaths include suicide and deaths from pulmonary, hepatobiliary, gastrointestinal, procedural, and accidental causes.
