# Supplementary material
Source: PubMed Central journal article supplement (PMC4549188)
Supplement: NIHMS686213-supplement-8.pdf [file NIHMS686213-supplement-8.pdf]

**Table S6**— Non-competing risk estimates of cause-specific annualized mortality according baseline protein to creatinine ratio

| Type of Death                        | Q1                     | Q2                    | Q3                    | Q4                     | P                |
|--------------------------------------|------------------------|-----------------------|-----------------------|------------------------|------------------|
|                                      | 1.85-44.58<br>(N=1009) | 0.39-1.85<br>(N=1009) | 0.13-0.39<br>(N=1009) | 0.003-0.13<br>(N=1009) | Value            |
| Overall                              | 10.64                  | 8.08                  | 8.43                  | 5.57                   | <0.001           |
| <b>CV Death</b>                      | <b>5.77</b>            | <b>4.67</b>           | <b>4.42</b>           | <b>3.06</b>            | <b>&lt;0.001</b> |
| Fatal MI                             | 0.60                   | 0.64                  | 0.76                  | 0.34                   | 0.32             |
| Fatal Stroke                         | 0.73                   | 0.44                  | 0.32                  | 0.23                   | 0.02             |
| Presumed CV Death                    | 0.77                   | 0.64                  | 0.44                  | 0.50                   | 0.15             |
| Pump Failure                         | 0.64                   | 0.60                  | 0.96                  | 0.73                   | 0.44             |
| CV Other                             | 0.43                   | 0.20                  | 0.24                  | 0.19                   | 0.16             |
| Presumed Sudden Death                | 0.51                   | 0.44                  | 0.20                  | 0.27                   | 0.07             |
| Definite Sudden Death                | 2.09                   | 1.69                  | 1.49                  | 0.80                   | <0.001           |
| Definite or Presumed<br>Sudden Death | 2.61                   | 2.13                  | 1.69                  | 1.07                   | <0.001           |
| <b>Non-CV Death</b>                  | <b>3.76</b>            | <b>2.81</b>           | <b>3.33</b>           | <b>2.18</b>            | <b>0.01</b>      |
| Infection                            | 1.62                   | 0.80                  | 1.04                  | 0.53                   | 0.001            |
| Malignancy                           | 0.56                   | 0.52                  | 0.92                  | 0.57                   | 0.55             |
| Other                                | 0.94                   | 1.13                  | 1.25                  | 0.84                   | 0.80             |
| Renal                                | 0.64                   | 0.36                  | 0.12                  | 0.23                   | 0.01             |
| <b>Unknown</b>                       | <b>1.11</b>            | <b>0.60</b>           | <b>0.68</b>           | <b>0.34</b>            | <b>0.003</b>     |

Incident rates (non-competing risk estimates) are provided in events per 100 patient-years. P values are for trend in incidence rate attributable to each cause across PCR quartiles. Renal deaths defined as refusal of dialysis, or death in the setting of acute kidney injury or from direct complications of uremia, dialysis, or renal procedure. Other deaths include suicide and deaths from pulmonary, hepatobiliary, gastrointestinal, procedural, and accidental causes.
