# Supplementary material
Source: PubMed Central journal article supplement (PMC4549188)
Supplement: NIHMS686213-supplement-9.pdf [file NIHMS686213-supplement-9.pdf]

**Table S7.** Cause-specific cumulative incidence according baseline eGFR and treatment

| Type of Death                     | Q1<br>0.9-24.2<br>mL/min/1.73m <sup>2</sup> |                        | Q2<br>24.3-31.6<br>mL/min/1.73m <sup>2</sup> |                        | Q3<br>31.7-40.2<br>mL/min/1.73m <sup>2</sup> |                        | Q4<br>40.3-119.8<br>mL/min/1.73m <sup>2</sup> |                        | P <sub>trend</sub> * | P <sub>Interaction</sub> |
|-----------------------------------|---------------------------------------------|------------------------|----------------------------------------------|------------------------|----------------------------------------------|------------------------|-----------------------------------------------|------------------------|----------------------|--------------------------|
|                                   | Placebo<br>(N=540)                          | Darbepoetin<br>(N=468) | Placebo<br>(N=509)                           | Darbepoetin<br>(N=505) | Placebo<br>(N=476)                           | Darbepoetin<br>(N=531) | Placebo<br>(N=499)                            | Darbepoetin<br>(N=507) |                      |                          |
| Overall                           | 32.9%                                       | 27.9%                  | 17.9%                                        | 24.4%                  | 19.9%                                        | 18.2%                  | 17.3%                                         | 19.1%                  | <0.001               | 0.28                     |
| <b>CV Death</b>                   | 15.9%                                       | 14.7%                  | 11.2%                                        | 11.0%                  | 12.3%                                        | 10.3%                  | 9.4%                                          | 11.2%                  | <0.001               | 0.26                     |
| Fatal MI                          | 2.6%                                        | 1.5%                   | 3.0%                                         | 0.8%                   | 0.9%                                         | 0.8%                   | 1.2%                                          | 1.1%                   | 0.07                 | 0.52                     |
| Fatal Stroke                      | 0.9%                                        | 1.8%                   | 1.3%                                         | 1.6%                   | 0.7%                                         | 1.3%                   | 0.5%                                          | 0.7%                   | 0.03                 | 0.57                     |
| Presumed CV Death                 | 1.8%                                        | 2.0%                   | 1.0%                                         | 1.9%                   | 1.8%                                         | 1.6%                   | 0.2%                                          | 2.4%                   | 0.23                 | 0.06                     |
| Pump Failure                      | 3.0%                                        | 1.7%                   | 2.1%                                         | 1.3%                   | 1.2%                                         | 1.4%                   | 2.5%                                          | 1.9%                   | 0.45                 | 0.26                     |
| CV Other                          | 0.8%                                        | 0.2%                   | 1.1%                                         | 0.9%                   | 1.1%                                         | 0.2%                   | 0.8%                                          | 0.7%                   | 0.62                 | 0.69                     |
| Presumed Sudden Death             | 1.6%                                        | 1.1%                   | 0.2%                                         | 1.1%                   | 2.2%                                         | 0.9%                   | 0.5%                                          | 0.4%                   | 0.34                 | 0.86                     |
| Definite Sudden Death             | 5.2%                                        | 6.3%                   | 2.5%                                         | 3.3%                   | 4.4%                                         | 4.1%                   | 3.6%                                          | 4.0%                   | 0.07                 | 0.90                     |
| Definite or Presumed Sudden Death | 6.8%                                        | 7.4%                   | 2.7%                                         | 4.5%                   | 6.6%                                         | 5.0%                   | 4.1%                                          | 4.4%                   | 0.04                 | 0.97                     |
| <b>Non-CV Death</b>               | 14.1%                                       | 11.0%                  | 5.4%                                         | 11.3%                  | 6.5%                                         | 6.9%                   | 6.2%                                          | 6.1%                   | <0.001               | 0.90                     |
| Infection                         | 6.0%                                        | 3.7%                   | 2.2%                                         | 3.1%                   | 2.0%                                         | 2.0%                   | 0.8%                                          | 2.3%                   | <0.001               | 0.09                     |
| Malignancy                        | 1.8%                                        | 2.1%                   | 1.0%                                         | 3.3%                   | 1.3%                                         | 1.5%                   | 1.6%                                          | 1.9%                   | 0.43                 | 0.57                     |
| Other                             | 4.6%                                        | 3.3%                   | 1.8%                                         | 3.5%                   | 2.7%                                         | 2.2%                   | 3.1%                                          | 1.5%                   | 0.03                 | 0.23                     |
| Renal                             | 1.8%                                        | 1.9%                   | 0.4%                                         | 1.4%                   | 0.4%                                         | 1.2%                   | 0.6%                                          | 0.4%                   | 0.01                 | 0.78                     |
| <b>Unknown</b>                    | 2.8%                                        | 2.2%                   | 1.1%                                         | 2.1%                   | 1.1%                                         | 1.0%                   | 1.7%                                          | 1.7%                   | 0.17                 | 0.69                     |

\* Adjusted for treatment. Cumulative incidence rates at 3-years. P values are for the interaction of treatment with eGFR. Renal deaths defined as refusal of dialysis, or death in the setting of acute kidney injury or from direct complications of uremia, dialysis, or renal procedure. Other deaths include suicide and deaths from pulmonary, hepatobiliary, gastrointestinal, procedural, and accidental causes.
