# Supplementary material
Source: PubMed Central journal article supplement (PMC4549188)
Supplement: NIHMS686213-supplement-10.pdf [file NIHMS686213-supplement-10.pdf]

**Table S8.** Cause-specific cumulative incidence according baseline PCR and treatment

| Type of Death                     | Q1<br>1.854-44.58 (g/g) |                        | Q2<br>0.39-1.85 (g/g) |                        | Q3<br>0.13-0.39 (g/g) |                        | Q4<br>0.003-0.13 (g/g) |                        | P <sub>trend</sub> * | P <sub>Interaction</sub> |
|-----------------------------------|-------------------------|------------------------|-----------------------|------------------------|-----------------------|------------------------|------------------------|------------------------|----------------------|--------------------------|
|                                   | Placebo<br>(N=486)      | Darbepoetin<br>(N=523) | Placebo<br>(N=541)    | Darbepoetin<br>(N=468) | Placebo<br>(N=510)    | Darbepoetin<br>(N=499) | Placebo<br>(N=489)     | Darbepoetin<br>(N=520) |                      |                          |
| Overall                           | 28.8%                   | 28.6%                  | 23.3%                 | 20.0%                  | 21.8%                 | 23.4%                  | 15.1%                  | 17.1%                  | <0.001               | 0.35                     |
| <b>CV Death</b>                   | 16.5%                   | 14.0%                  | 13.6%                 | 10.9%                  | 11.2%                 | 12.2%                  | 8.0%                   | 9.9%                   | <0.001               | 0.12                     |
| Fatal MI                          | 1.1%                    | 1.3%                   | 3.2%                  | 0.7%                   | 2.2%                  | 1.6%                   | 1.2%                   | 0.6%                   | 0.38                 | 0.52                     |
| Fatal Stroke                      | 2.6%                    | 1.6%                   | 0.6%                  | 1.6%                   | 0.2%                  | 1.4%                   | 0.2%                   | 0.8%                   | 0.01                 | 0.03                     |
| Presumed CV Death                 | 1.0%                    | 2.6%                   | 1.7%                  | 2.1%                   | 0.8%                  | 1.5%                   | 1.2%                   | 1.8%                   | 0.19                 | 0.77                     |
| Pump Failure                      | 2.2%                    | 1.1%                   | 2.0%                  | 0.7%                   | 3.1%                  | 2.4%                   | 1.9%                   | 2.1%                   | 0.32                 | 0.24                     |
| CV Other                          | 1.3%                    | 0.9%                   | 0.6%                  | 0.2%                   | 0.9%                  | 0.4%                   | 1.0%                   | 0.4%                   | 0.23                 | 0.49                     |
| Presumed Sudden Death             | 1.3%                    | 1.5%                   | 1.9%                  | 0.2%                   | 0.5%                  | 0.6%                   | 0.7%                   | 1.2%                   | 0.10                 | 0.47                     |
| Definite Sudden Death             | 7.0%                    | 4.9%                   | 3.6%                  | 5.4%                   | 3.5%                  | 4.4%                   | 1.8%                   | 3.1%                   | <0.001               | 0.26                     |
| Definite or Presumed Sudden Death | 8.3%                    | 6.5%                   | 5.4%                  | 5.6%                   | 3.9%                  | 5.0%                   | 2.5%                   | 4.2%                   | <0.001               | 0.18                     |
| <b>Non-CV Death</b>               | 8.8%                    | 11.8%                  | 8.8%                  | 6.9%                   | 8.1%                  | 10.7%                  | 7.1%                   | 5.9%                   | 0.01                 | 0.29                     |
| Infection                         | 3.9%                    | 5.1%                   | 3.8%                  | 0.9%                   | 2.0%                  | 3.3%                   | 1.6%                   | 1.6%                   | 0.002                | 0.82                     |
| Malignancy                        | 1.2%                    | 1.8%                   | 1.3%                  | 2.0%                   | 1.5%                  | 3.9%                   | 1.8%                   | 1.2%                   | 0.44                 | 0.16                     |
| Other                             | 2.8%                    | 1.9%                   | 2.4%                  | 3.6%                   | 4.3%                  | 2.8%                   | 2.7%                   | 2.3%                   | 0.98                 | 0.78                     |
| Renal                             | 0.9%                    | 2.9%                   | 1.3%                  | 0.4%                   | 0.2%                  | 0.7%                   | 1.0%                   | 0.7%                   | 0.01                 | 0.20                     |
| <b>Unknown</b>                    | 3.5%                    | 2.9%                   | 1.0%                  | 2.2%                   | 2.5%                  | 0.5%                   | 0.0%                   | 1.4%                   | 0.003                | 0.10                     |

\* Adjusted for treatment. Cumulative incidence rates at 3-years. P values are for the interaction of treatment with PCR. Renal deaths defined as refusal of dialysis, or death in the setting of acute kidney injury or from direct complications of uremia, dialysis, or renal procedure. Other deaths include suicide and deaths from pulmonary, hepatobiliary, gastrointestinal, procedural, and accidental causes.
