# Supplementary material
Source: PubMed Central journal article supplement (PMC4549188)

**Figure S1**-Distribution of eGFR (A) and PCR (B) in the study population

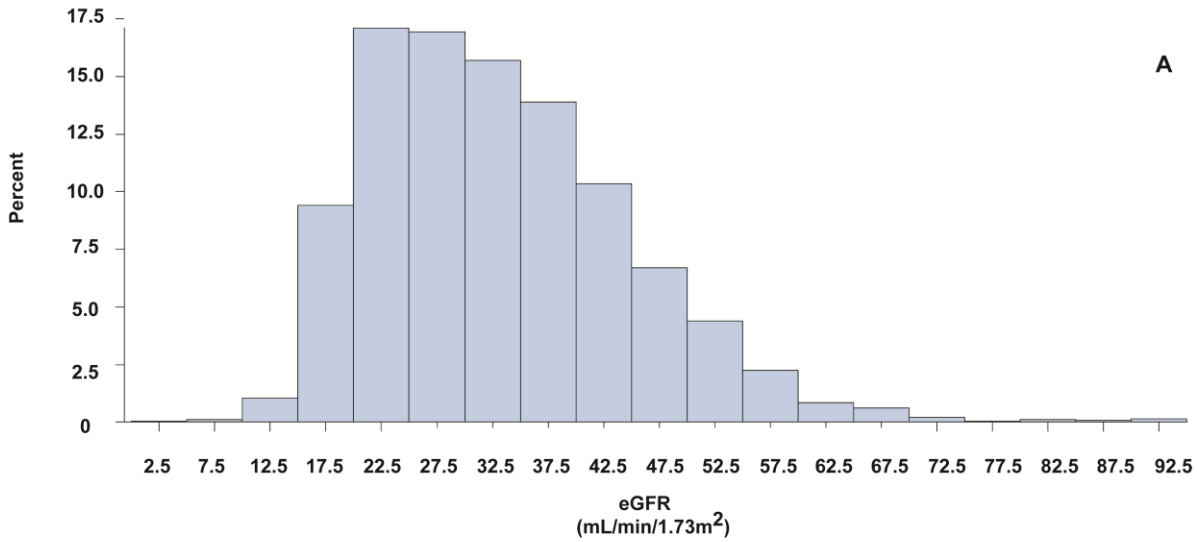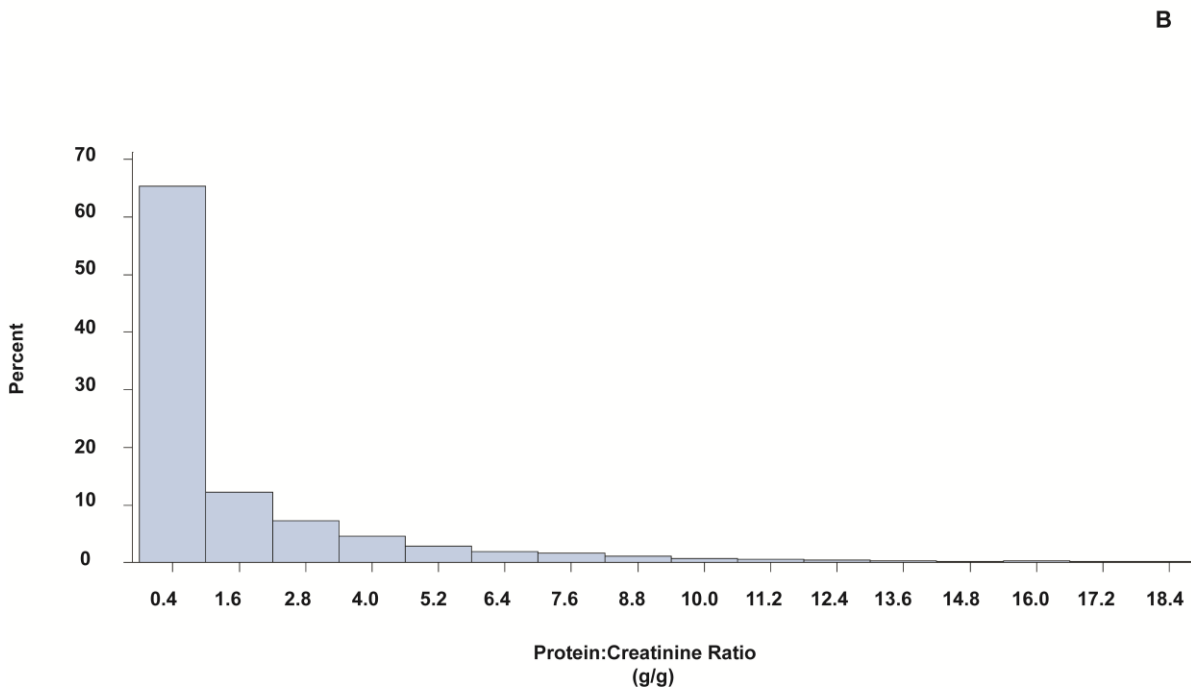

Supplement: NIHMS686213-supplement-1.pdf [file NIHMS686213-supplement-1.pdf]
